# Supplementary material for: Embryonic development and inviability phenotype of chicken-Japanese quail F1 hybrids
Source: PubMed Central journal article supplement (PMC4873824; doi:10.1038/srep26369), 2016-05-20
Supplement: srep26369-s1.pdf [file srep26369-s1.pdf]

## **Supplementary Information**

### **Embryonic development and inviability phenotype of chicken- Japanese quail F<sub>1</sub> hybrids**

Satoshi Ishishita<sup>1</sup>, Keiji Kinoshita<sup>1</sup>, Mikiharu Nakano<sup>1</sup>, Yoichi Matsuda<sup>1,2\*</sup>

<sup>1</sup>Avian Bioscience Research Center, Graduate School of Bioagricultural Sciences,

<sup>2</sup>Laboratory of Animal Genetics, Department of Applied Molecular Biosciences, Graduate School of Bioagricultural Sciences, Nagoya University, Furo-cho, Chikusa-ku, Nagoya, Aichi, 464-8601, Japan

\* Corresponding author.

**Table S1. Developmental status of hybrid embryos between Japanese quails and chickens (Ehimejitori and NH-413) at 3 d of incubation**

| Trial                         | Chicken strain/breed | Quails <sup>1</sup> | Fertile quails <sup>2</sup> | Egg collection <sup>3</sup> (days) | AI <sup>4</sup> (times) | Incubated eggs <sup>5</sup> | Fertilized egg <sup>6</sup> | Membrane <sup>7</sup> | Membrane & Blood <sup>8</sup> | Dead embryo <sup>9</sup> | Living embryo <sup>10</sup> |
|-------------------------------|----------------------|---------------------|-----------------------------|------------------------------------|-------------------------|-----------------------------|-----------------------------|-----------------------|-------------------------------|--------------------------|-----------------------------|
| 1                             | Ehimejitori          | 7                   | 7                           | 31                                 | 7                       | 191                         | 58                          | 11                    | 25                            | 7                        | 15                          |
|                               | NH-413               | 8                   | 7                           | 31                                 | 7                       | 209                         | 63                          | 16                    | 25                            | 15                       | 7                           |
| 2                             | Ehimejitori          | 38                  | 37                          | 76                                 | 24                      | 1944                        | 611                         | 291                   | 208                           | 20                       | 92                          |
| Total                         |                      | -                   | -                           | -                                  | -                       | 2344                        | 732                         | 318                   | 258                           | 42                       | 114                         |
| Frequency for incubated eggs  |                      |                     |                             |                                    |                         |                             | 31.2%                       | 13.6%                 | 11.0%                         | 1.8%                     | 4.9%                        |
| Frequency for fertilized eggs |                      |                     |                             |                                    |                         |                             | -                           | 43.4%                 | 35.2%                         | 5.7%                     | 15.6%                       |

Quail eggs artificially inseminated with chicken semen were incubated for 3, 5, or 7 d, and fertilization and embryonic development were examined (see Methods). Stages at which embryonic development was arrested were estimated from the morphology of dead embryos (see Methods).

<sup>1</sup>Number of quail females used for artificial insemination.

<sup>2</sup>Number of quail females that laid fertilized eggs.

<sup>3</sup>Days of egg collection during each trial.

<sup>4</sup>Number of artificial insemination during each trial.

<sup>5</sup>Number of incubated eggs.

<sup>6</sup>Number of fertilized eggs.

<sup>7</sup>Number of fertilized eggs that showed developmental arrest with extraembryonic membrane and no discernible embryos.

<sup>8</sup>Number of fertilized eggs that showed developmental arrest with extraembryonic membrane, blood island, and no discernible embryos.

<sup>9</sup>Number of fertilized eggs with discernible embryos that were dead at 3 d of incubation.

<sup>10</sup>Number of fertilized eggs with discernible embryos that were alive at 3 d of incubation.

**Table S2. Developmental stages of chickens, quails, and their hybrids**

| Hours of incubation | Chicken                                | Quail                                                | Hybrid                                                   |
|---------------------|----------------------------------------|------------------------------------------------------|----------------------------------------------------------|
| 7.5–8               | -                                      | -                                                    | St. XI (1)<br>St. XII (2)<br>St. XIII (3)<br>St. XIV (1) |
| 12                  | St. 3 (2)                              | St. 2 (1)<br>St. 3 (4)                               | XIII (4)<br>XIV (1)<br>2 (3)                             |
| 24                  | St. 5 (4)                              | St. 6 (4)                                            | St. 4 (2)                                                |
| 48                  | St. 12 (1)<br>St. 13 (1)               | St. 13 (3)                                           | St. 9 (1)<br>St. 10 (2)<br>St. 11 (1)<br>St. 13 (2)      |
| 72                  | St. 16 (1)<br>St. 17 (1)<br>St. 18 (3) | St. 16 (1)<br>St. 17 (1)<br>St. 18 (2)<br>St. 19 (6) | St. 15 (1)<br>St. 16 (5)<br>St. 17 (8)                   |
| 96                  | St. 24 (2)                             | St. 24 (6)                                           | St. 19 (2)<br>St. 20 (1)                                 |
| 120                 | St. 27 (4)                             | St. 27 (3)                                           | St. 23 (2)<br>St. 24 (1)<br>St. 25 (1)                   |
| 144                 | St. 29 (3)                             | St. 29 (1)                                           | St. 27 (2)                                               |
| 168                 | St. 31 (4)                             | St. 33 (6)                                           | St. 29 (5)<br>St. 30 (1)                                 |
| Hatching            | Day 21 (5)                             | Day 17 (8)<br>Day 18 (19)<br>Day 19 (1)              | Day 18 (6)<br>Day 19 (3)<br>Day 20 (6)<br>Day 21 (2)     |

For staging of chicken and quail embryos, GSP line chickens and commercial quails were used. Hybrid embryos (GSP males × commercial quail females) were used for all observations, except for those at 7.5–8 h of incubation (Ehimejitori or BL-E males × commercial quail females) and 168 h of incubation (Ehimejitori males × commercial quail females). The number of hybrid embryos is indicated within parentheses.

**Table S3. Sex ratio of living hybrid embryos at various incubation times**

| Incubation time | Paternal strain             | Males    |          | Females  |          | Male frequency | p-value* | $\chi^2$ |
|-----------------|-----------------------------|----------|----------|----------|----------|----------------|----------|----------|
|                 |                             | Observed | Expected | Observed | Expected |                |          |          |
| 0 h             | GSP                         | 25       | 28.5     | 32       | 28.5     | 43.9%          | 0.354    | 0.860    |
| 2-3 d           | NH-413<br>or<br>Ehimejitori | 16       | 13.5     | 11       | 13.5     | 59.3%          | 0.336    | 0.926    |
| 5 d             | Ehimejitori                 | 15       | 13       | 11       | 13       | 57.7%          | 0.433    | 0.615    |
| 7 d             | BL-E<br>or<br>Ehimejitori   | 24       | 20.5     | 17       | 20.5     | 58.5%          | 0.274    | 1.200    |

One embryo at 5 d of incubation, with unknown sex, was not used for chi-squared test.

\*Pearson's chi-squared goodness of fit test.

**Table S4. Sex ratio of malformed hybrid embryos**

| Sex    | Number of embryos at 2–4 d or more |           |       | Number of embryos at 10 d or more |           |       |
|--------|------------------------------------|-----------|-------|-----------------------------------|-----------|-------|
|        | Normal                             | Malformed | Total | Normal                            | Malformed | Total |
| Male   | 37                                 | 10        | 47    | 30                                | 9         | 39    |
| Female | 26                                 | 16        | 42    | 14                                | 8         | 22    |
| n.d.   | 15                                 | 0         | 15    | 0                                 | 0         | 0     |
| Total  | 78                                 | 26        | 104   | 44                                | 17        | 61    |

n.d., not determined.

**Table S5. Summary of artificial insemination**

|       | Sampling periods |              | Egg collection <sup>1</sup><br>(Days) | AI <sup>2</sup><br>(times) | Chicken breed/line <sup>3</sup> | Quail group <sup>4</sup> | Number of quails <sup>5</sup> | Number of fertile quails <sup>6</sup> | Number of incubated eggs <sup>7</sup> | Number of fertilized eggs <sup>8</sup> | Examination items                                                                                                                                                                                 |
|-------|------------------|--------------|---------------------------------------|----------------------------|---------------------------------|--------------------------|-------------------------------|---------------------------------------|---------------------------------------|----------------------------------------|---------------------------------------------------------------------------------------------------------------------------------------------------------------------------------------------------|
| 1     | 3/31/2010        | – 4/30/2010  | 31                                    | 7                          | EJ                              | A                        | 15                            | 14                                    | 400                                   | 121                                    | Fertility and survivability at 3 d. Sex ratio of 2–3-d living embryos.                                                                                                                            |
| 2     | 7/23/2010        | – 11/24/2010 | 76                                    | 24                         | EJ / NH-413                     | B                        | 38                            | 37                                    | 1944                                  | 611                                    | Fertility and survivability at 3 d. Sex ratio of 5-d living embryos.                                                                                                                              |
| 3     | 7/19/2012        | – 2/25/2013  | 81                                    | 48                         | GSP                             | C                        | 9                             | 9                                     | 401                                   | 213                                    | Developmental stage. Early embryogenesis at 21–36 h. Sex ratio of 0-h blastoderms.                                                                                                                |
| 4     | 9/1/2012         | – 4/8/2013   | 112                                   | 56                         | GSP                             | D                        | 24                            | 19                                    | 333                                   | 254                                    | Developmental stage. Morphology and body weight of 12-d, 14-d, and 16-d living embryos.                                                                                                           |
| 5     | 10/7/2012        | – 4/13/2013  | 75                                    | 45                         | GSP                             | E                        | 12                            | 9                                     | 574                                   | 200                                    | Developmental stage. Morphology of 12-d living embryos.                                                                                                                                           |
| 6     | 6/3/2013         | – 10/8/2013  | 106                                   | 21                         | BL-E                            | F                        | 12                            | 10                                    | 594                                   | 168                                    | Sex ratio of 7-d living embryos.                                                                                                                                                                  |
| 7     | 7/18/2013        | – 10/8/2013  | 60                                    | 10                         | BL-E                            | G                        | 12                            | 7                                     | 239                                   | 41                                     | Sex ratio of 7-d living embryos. Early embryogenesis at 7.5–10 h.                                                                                                                                 |
| 8     | 8/25/2013        | – 12/29/2013 | 34                                    | 5                          | BL-E                            | H                        | 8                             | 8                                     | 203                                   | 38                                     | Sex ratio of 7-d living embryos. Early embryogenesis at 7.5–10 h.                                                                                                                                 |
| 9     | 10/24/2013       | – 12/8/2013  | 27                                    | 12                         | EJ                              | I                        | 15                            | 11                                    | 232                                   | 52                                     | Sex ratio and body weight of 7-d living embryos.                                                                                                                                                  |
| 10    | 2/4/2014         | – 3/14/2014  | 37                                    | 15                         | EJ                              | H                        | 2                             | 1                                     | 11                                    | 7                                      | Body weight of 10-d living embryos.                                                                                                                                                               |
| 11    | 2/4/2014         | – 5/1/2014   | 68                                    | 27                         | EJ                              | J                        | 16                            | 11                                    | 261                                   | 51                                     | Morphology and body weight of 10-d living embryos.                                                                                                                                                |
| 12    | 5/10/2014        | – 5/30/2014  | 13                                    | 5                          | EJ                              | J                        | 3                             | 1                                     | 5                                     | 2                                      | Developmental stage. Sex ratio and body weight of 7-d living embryos.                                                                                                                             |
|       |                  |              | 13                                    | 5                          | EJ                              | K                        | 16                            | 13                                    | 155                                   | 31                                     |                                                                                                                                                                                                   |
| 13    | 6/1/2014         | – 10/13/2014 | 78                                    | 27                         | GSP                             | J                        | 2                             | 2                                     | 113                                   | 27                                     | Fertility, survivability at various incubation periods, and hatchability. Temporal changes of sex ratio. Frequency of malformed embryos. Body weight of 12–18-d dead embryos and hatched hybrids. |
|       |                  |              | 78                                    | 27                         | GSP                             | K                        | 28                            | 26                                    | 1556                                  | 382                                    |                                                                                                                                                                                                   |
| 14    | 6/17/2015        | – 7/15/2015  | 24                                    | 6                          | GSP                             | L                        | 9                             | 8                                     | 59                                    | 38                                     | Developmental stage. Early embryogenesis at 12–15 h. Sex ratio of stage XI–XIV-like blastoderms.                                                                                                  |
| 15    | 6/24/2015        | – 7/15/2015  | 17                                    | 4                          | GSP                             | M                        | 14                            | 7                                     | 47                                    | 22                                     | Developmental stage. Early embryogenesis at 12–15 h. Sex ratio of stage XI–XIV-like blastoderms.                                                                                                  |
| 16    | 8/19/2015        | – 8/27/2015  | 9                                     | 3                          | GSP                             | M                        | 7                             | 7                                     | 61                                    | 25                                     | Developmental stage. Early embryogenesis at 48 h.                                                                                                                                                 |
| Total |                  |              | 939                                   | 347                        |                                 |                          | 242                           | 200                                   | 7188                                  | 2283                                   |                                                                                                                                                                                                   |

<sup>1</sup>Days of egg collection.<sup>2</sup>Number of artificial insemination (AI).<sup>3</sup>Chicken breed or line used for AI.<sup>4</sup>Names of female quail groups used for AI.<sup>5</sup>Number of female quails used for AI.<sup>6</sup>Number of female quails that laid fertilized eggs.<sup>7</sup>Number of incubated eggs.<sup>8</sup>Number of fertilized eggs.

EJ, Ehimejitori.

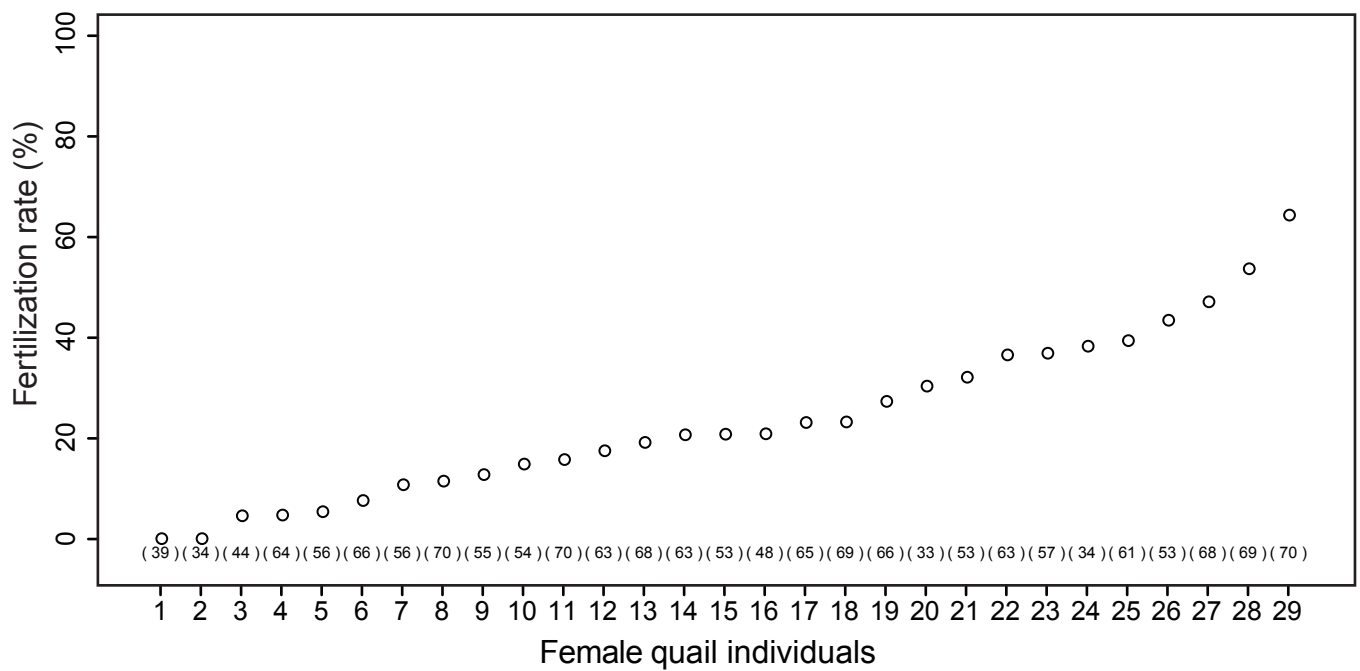

**Figure S1. Fertilization rates in interspecific crosses between female quails and male chickens.** The horizontal axis indicates individual identification numbers of female quails. Each point represents a percentage of fertilized eggs in incubated eggs. The number within each parenthesis is the number of incubated eggs.

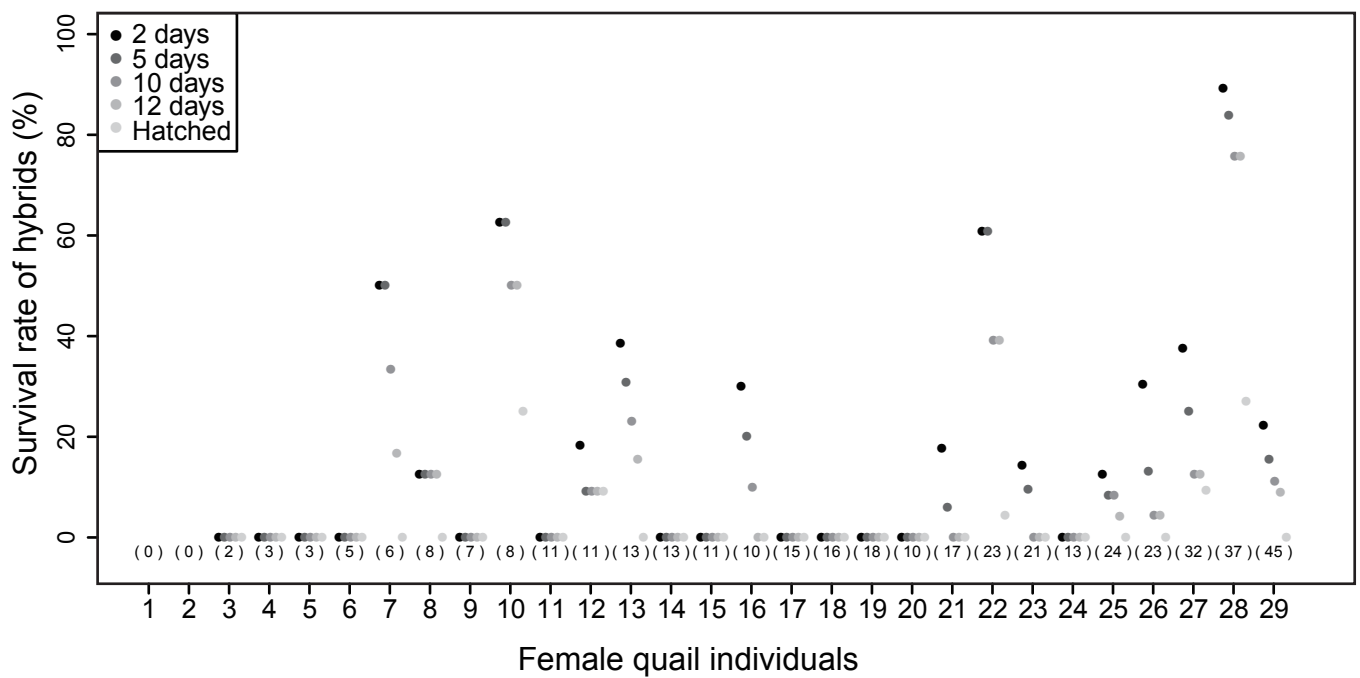

**Figure S2. Survival and hatching rates of interspecific hybrids.** The horizontal axis indicates individual identification numbers of female quails. Each point represents a percentage of living embryos at 2, 5, 10, or 12 d of incubation or hatched hybrids in fertilized eggs. The number within each parenthesis is the number of fertilized eggs.



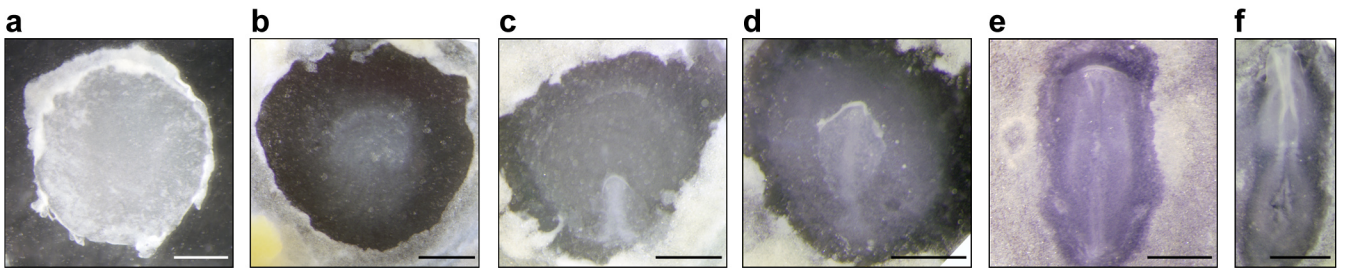

**Figure S3. The development of quail embryos during the early stage.** a–f, Representative images of quail embryos of stage X at 0 h (a), stage XIII at 9 h (b), stage 2 at 9.5 h (c), stage 3 at 18 h (d), stage 6 at 24 h (e), and stage 8 at 27 h (f) of incubation. Scale bars, 1 mm.

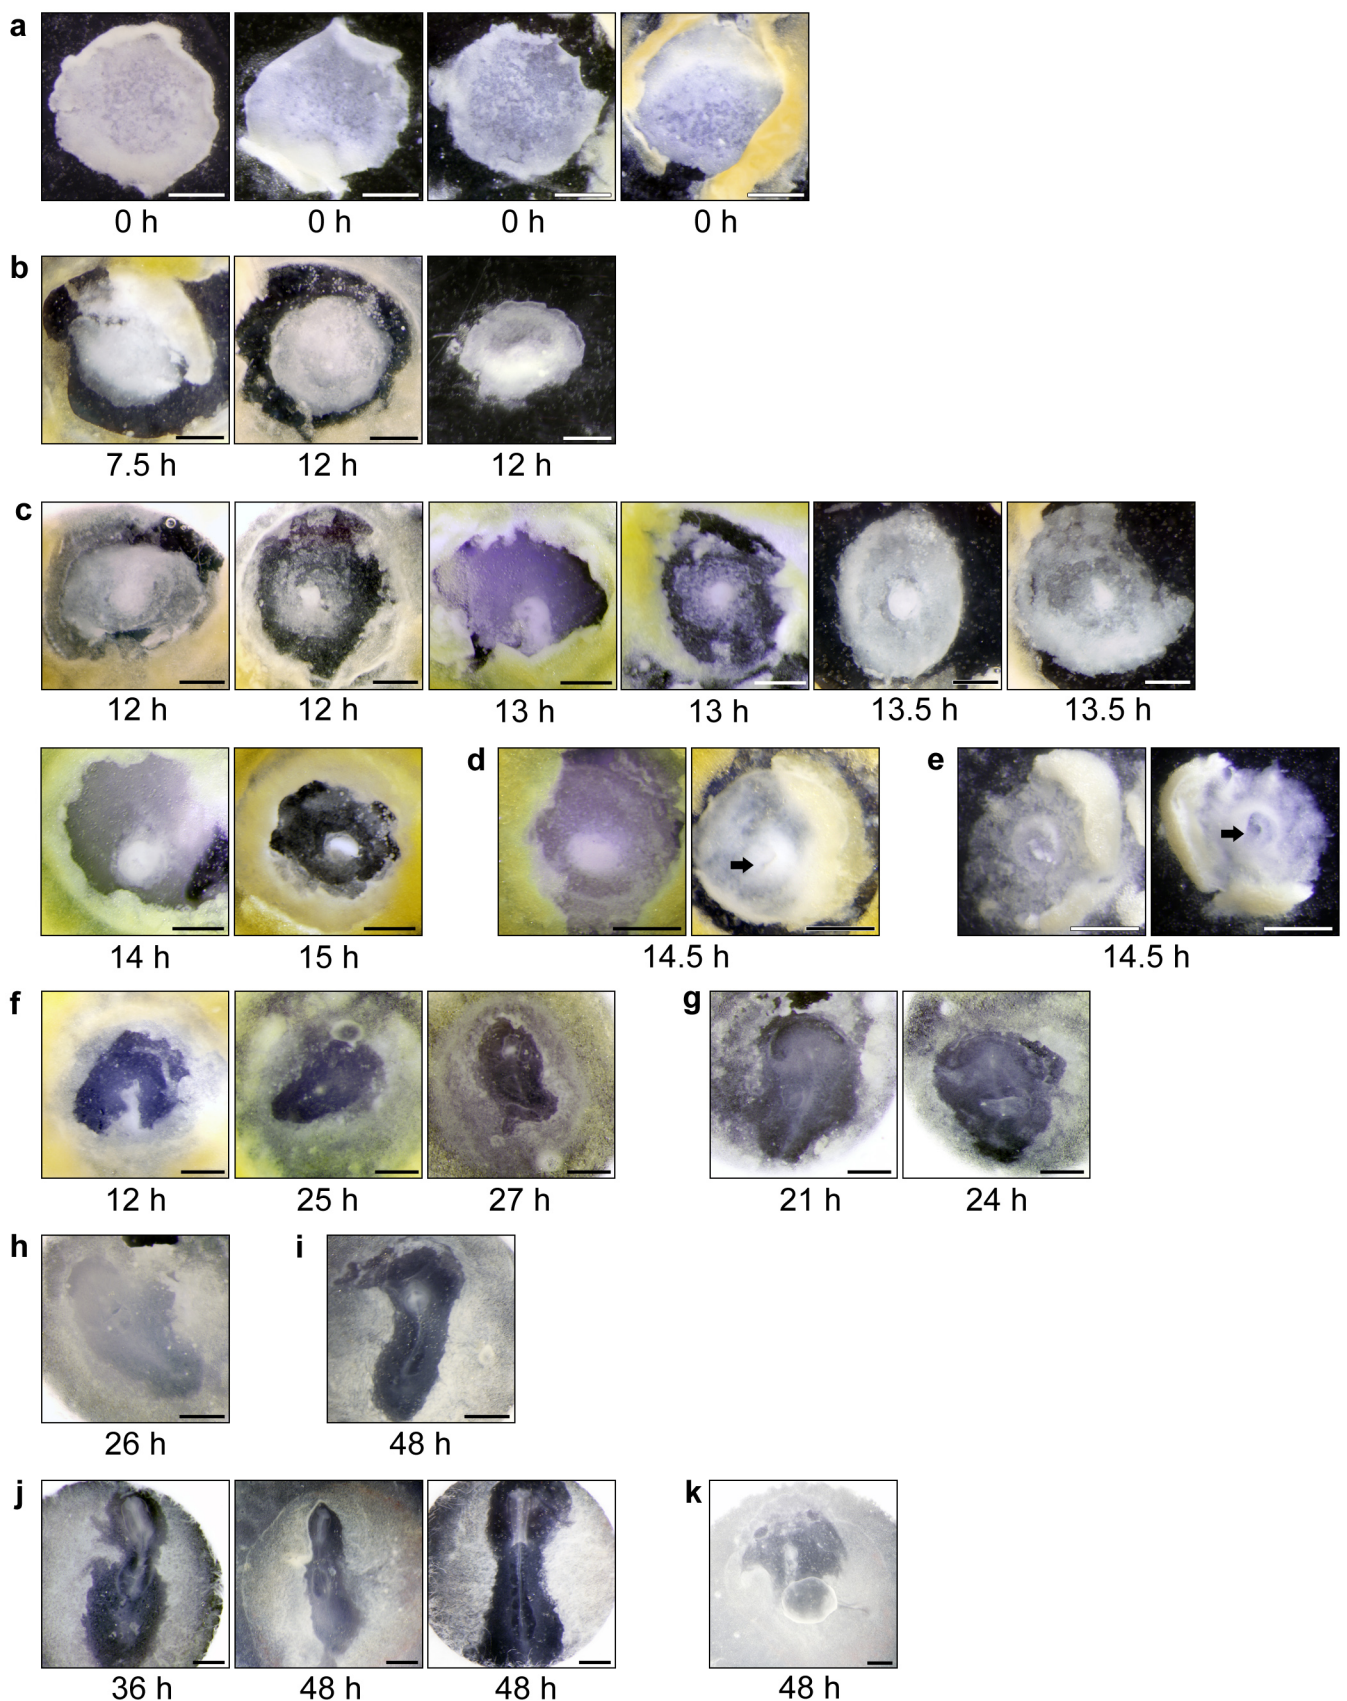

**Figure S4. Representative images of hybrid embryos at 0–48 h of incubation.** **a**, Stage X blastoderms with normal morphology. **b**, Blastoderms at stage X or earlier with abnormal morphology. **c**, Stage XI–XIV-like blastoderms with abnormal morphology. **d**, **e**, Ventral (left panels) and dorsal (right panels) views of stage X–XIV-like abnormal blastoderms. The central regions of the ventral sides of area pellucida are swollen and cavities (arrows) can be observed. **f**, Abnormal blastoderms at stages similar to 2 (left), 3 (middle), and 4 (right). **g**, The body axes of the stage 4-like blastoderms are not straight. **h**, **i**, Stage 5–6-like blastoderms with normal morphology (**h**) and with abnormal morphology (**i**). **j**, Abnormal embryos with stages equivalent to 9 (left and middle) and 10 (right). **k**, Degenerated embryo whose stage could not be determined. The incubation period is shown below each panel. All embryos except for those shown in the right panels in (**d**) and (**e**), and in the left and middle panels in (**j**), were photographed ventral side up. Scale bars, 1 mm.



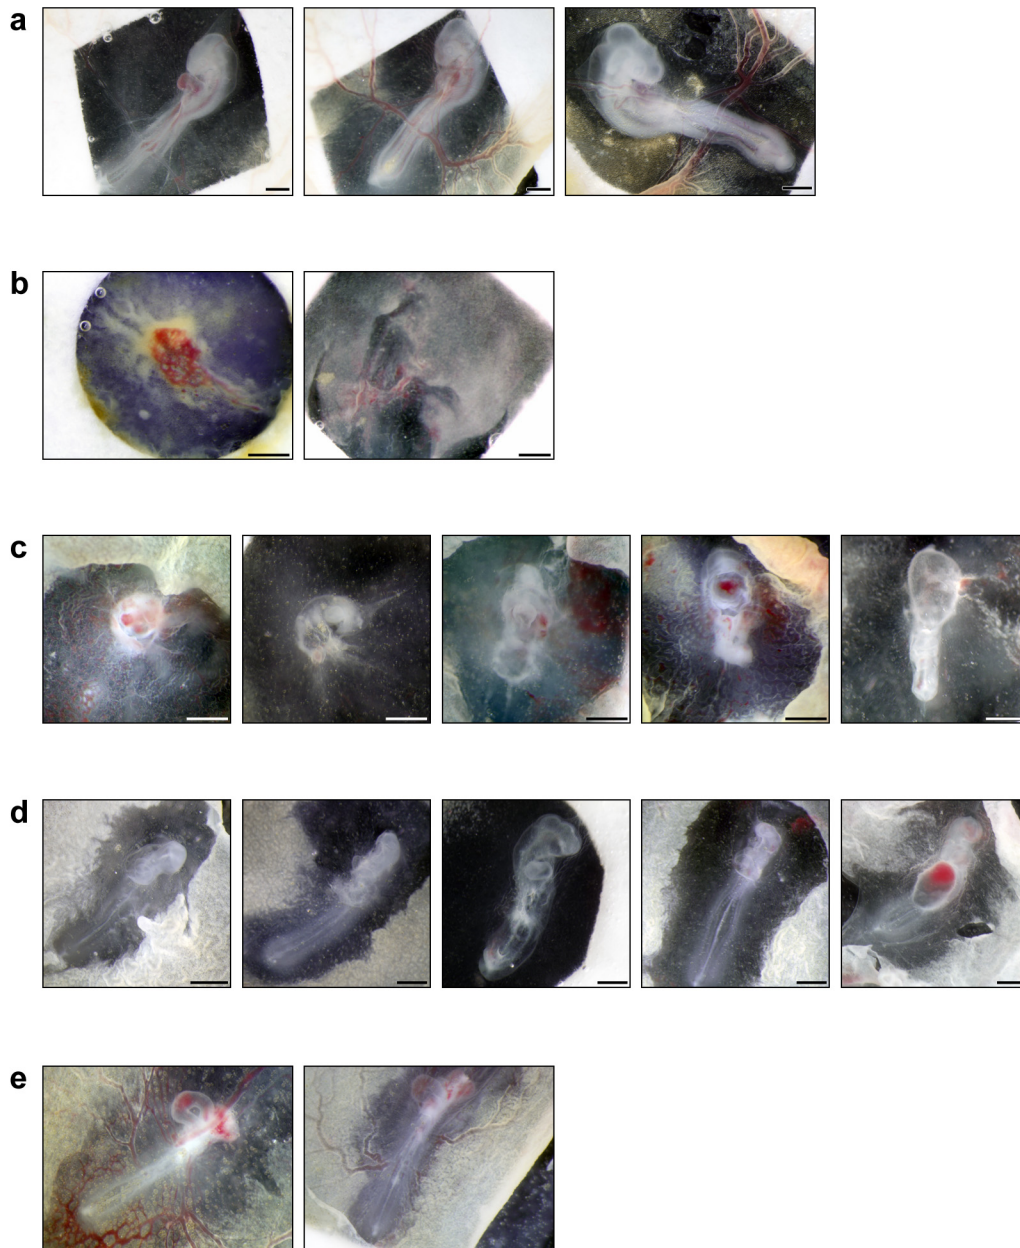

**Figure S5. Representative images of hybrid embryos at 72 h of incubation.** **a**, Embryos with normal morphology. **b**, Degenerated blood vessels and no discernible embryonic structures. **c**, Degenerated embryos whose stages could not be determined. **d**, Degenerated embryos with stages equivalent to the somite-to-pre-circulation stage. **e**, Post-circulation stage embryos exhibiting abnormal head development. All embryos except for those shown in **(c)** were photographed ventral side up. It is uncertain whether the images shown in **(c)** were taken from the dorsal or ventral side of the embryos. Scale bars, 1 mm.

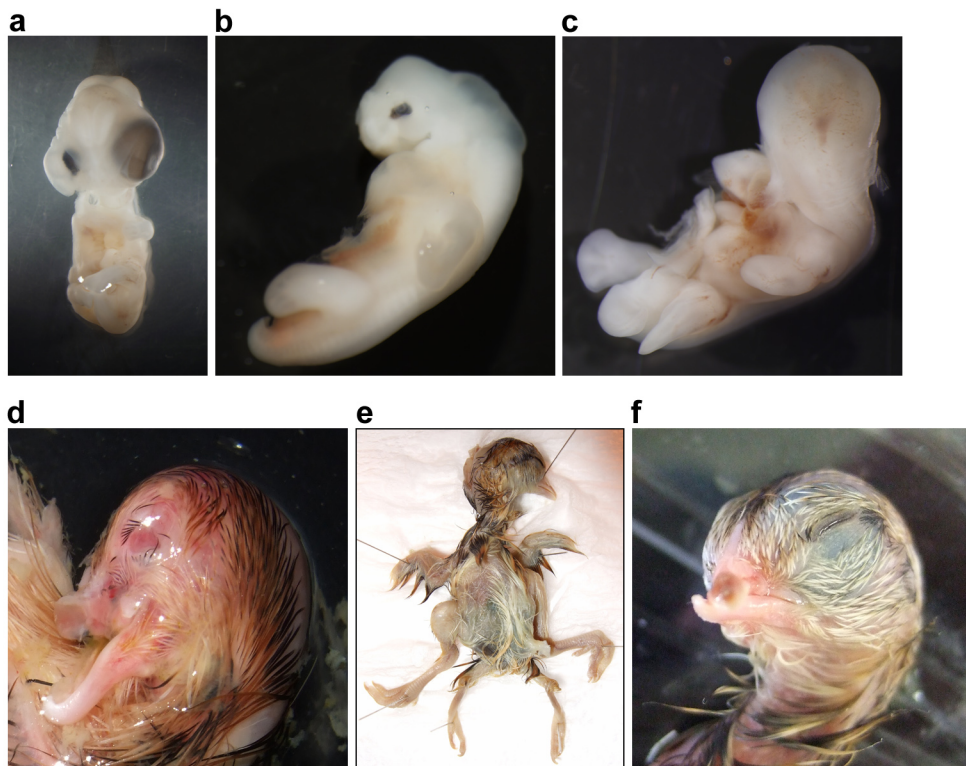

**Figure S6. Malformations in hybrid embryos.** a–c, Representative images of hybrid embryos at 7 d of incubation, exhibiting abnormal eye development (a), abnormal head development (b), and general malformation (c). d, e, Dead hybrid embryos at 12–18 d of incubation, exhibiting abnormal head development (d) and an additional pair of hind limbs (e). f, Representative image of malocclusion in hybrids that died prior to hatching.
